# Supplementary material for: Global, regional and national burdens of gout in the young population from 1990 to 2019: a population-based study
Source: HighWire-hosted journal article supplement (doi:10.1136/rmdopen-2023-003025), 2023-04-01
Supplement: rmdopen-2023-003025supp001_data_supplement.pdf [file rmdopen-2023-003025supp001_data_supplement.pdf]

## Supplementary Materials

Supplement Data 1. Table 1 Incidence of gout and years living with gout disability and their average annual percentage changes from 1990 to 2019 in individuals aged 15–39 years at the global and regional levels.

Supplement Data 2. Overview, data sources, modeling, definition, and data process for Global Burden of Disease 2019.

Supplement Data 3. Gout case definition, input data, and methodology in Global Burden of Disease 2019.

Supplement Data 4. The prevalence, incidence, and years lived with disability rates of gout in adolescents and young adults aged 15-39 years from 1990 to 2019 at the global level.

Supplement Data 5. The incidence of gout in senior population aged over 55years from 1990 to 2019 at the global level.

Supplement Data 6. The joinpoint regression of gout incidence, prevalence, and YLD in adolescents and young adults aged 15-39 years between 1990 and 2019 globally.

Supplement Data 7. Rates and number of cases of gout by SDI.

Supplement Data 8. Proportional attributable fraction of high-BMI by sex, age subgroup, and regions.

Supplement Data 9. Proportional attributable fraction of kidney dysfunction by sex, age subgroup, and regions.

**Supplement Data1. Table 1 Incidence of gout and years living with gout disability and their average annual percentage changes from 1990 to 2019 in individuals aged 15–39 years at the global and regional levels.**

Table 1. Incidence of gout and years living with gout disability and their average annual percentage changes from 1990 to 2019 in individuals aged 15–39 years at the global and regional levels.

|                  | Incidence (95% UI), per 100 000 population |                         |                             |                          |                         |         | YLD (95% UI), per 100 000 population |                       |                           |                       |                         |         |
|------------------|--------------------------------------------|-------------------------|-----------------------------|--------------------------|-------------------------|---------|--------------------------------------|-----------------------|---------------------------|-----------------------|-------------------------|---------|
|                  | Cases in 1990                              | Rate in 1990            | Cases in 2019               | Rate in 2019             | AAPC in rate, 1990–2019 | P value | Cases in 1990                        | Rate in 1990          | Cases in 2019             | Rate in 2019          | AAPC in rate, 1990–2019 | P value |
| <b>Global</b>    | 849175<br>(594354–1172622)                 | 38.71<br>(27.1–53.46)   | 1363085<br>(960539–1878303) | 45.93<br>(32.36–63.29)   | 0.61 (0.57 to 0.65)     | <0.001  | 107156<br>(63766–170053)             | 4.89<br>(2.91–7.75)   | 175377<br>(106554–271254) | 5.91<br>(3.59–9.14)   | 0.66 (0.6 to 0.73)      | <0.001  |
| <b>Sex</b>       |                                            |                         |                             |                          |                         |         |                                      |                       |                           |                       |                         |         |
| Male             | 683214<br>(483447–943373)                  | 61.57<br>(43.57–85.02)  | 1105822<br>(782548–1520040) | 73.59<br>(52.08–101.16)  | 0.63 (0.58 to 0.68)     | <0.001  | 85793<br>(51545–134495)              | 7.73<br>(4.65–12.12)  | 142072<br>(86213–216507)  | 9.45<br>(5.74–14.41)  | 0.69 (0.61 to 0.77)     | <0.001  |
| Female           | 165961<br>(110205–236278)                  | 15.31<br>(10.17–21.8)   | 257263<br>(173316–366784)   | 17.56<br>(11.83–25.03)   | 0.51 (0.48 to 0.54)     | <0.001  | 21362<br>(12165–34332)               | 1.97<br>(1.12–3.17)   | 33305<br>(19028–53566)    | 2.27<br>(1.3–3.66)    | 0.54 (0.51 to 0.58)     | <0.001  |
| <b>Age group</b> |                                            |                         |                             |                          |                         |         |                                      |                       |                           |                       |                         |         |
| 15–19            | 15075<br>(4326–31660)                      | 2.9<br>(0.83–6.09)      | 18285<br>(5245–38107)       | 2.95<br>(0.85–6.15)      | 0.17 (0.11 to 0.22)     | <0.001  | 754<br>(202–1716)                    | 0.15<br>(0.04–0.33)   | 915<br>(246–2064)         | 0.15<br>(0.04–0.33)   | 0.17 (0.11 to 0.22)     | <0.001  |
| 20–24            | 81467<br>(47825–122494)                    | 16.54<br>(9.71–24.86)   | 101923<br>(60316–151331)    | 16.98<br>(10.05–25.22)   | 0.29 (0.21 to 0.36)     | <0.001  | 6118<br>(2910–10869)                 | 1.24<br>(0.59–2.21)   | 7600<br>(3684–13454)      | 1.27<br>(0.61–2.24)   | 0.24 (0.17 to 0.31)     | <0.001  |
| 25–29            | 167398<br>(93456–263289)                   | 37.8<br>(21.1–59.45)    | 246401<br>(140983–382268)   | 40.7<br>(23.28–63.14)    | 0.33 (0.28 to 0.37)     | <0.001  | 18125<br>(9515–30088)                | 4.09<br>(2.15–6.79)   | 26654<br>(14458–43726)    | 4.4<br>(2.39–7.22)    | 0.33 (0.29 to 0.37)     | <0.001  |
| 30–34            | 246281<br>(167701–342394)                  | 63.86<br>(43.49–88.79)  | 427953<br>(294971–587577)   | 71.12<br>(49.02–97.65)   | 0.4 (0.35 to 0.45)      | <0.001  | 32281<br>(17692–53260)               | 8.37<br>(4.59–13.81)  | 55995<br>(31044–92029)    | 9.31<br>(5.16–15.29)  | 0.4 (0.35 to 0.45)      | <0.001  |
| 35–39            | 338953<br>(201952–540471)                  | 96.09<br>(57.25–153.22) | 568524<br>(337834–898443)   | 105.09<br>(62.45–166.08) | 0.47 (0.4 to 0.55)      | <0.001  | 49877<br>(29759–78857)               | 14.14<br>(8.44–22.36) | 84213<br>(51315–132269)   | 15.57<br>(9.49–24.45) | 0.5 (0.41 to 0.58)      | <0.001  |
| <b>SDI</b>       |                                            |                         |                             |                          |                         |         |                                      |                       |                           |                       |                         |         |
| High-middle SDI  | 172480<br>(120641–241383)                  | 53.39<br>(37.34–74.72)  | 257269<br>(187860–342425)   | 77.65<br>(56.7–103.36)   | 1.28 (1.26 to 1.29)     | <0.001  | 23554<br>(14172–37260)               | 7.29<br>(4.39–11.53)  | 36479<br>(23022–53809)    | 11.01<br>(6.95–16.24) | 1.4 (1.35 to 1.44)      | <0.001  |
| High SDI         | 205498<br>(143456–285206)                  | 42.5<br>(29.67–58.99)   | 297621<br>(207492–418459)   | 57.6<br>(40.16–80.98)    | 1.1 (1.03 to 1.17)      | <0.001  | 25875<br>(14949–40534)               | 5.35<br>(3.09–8.38)   | 38266<br>(22455–60342)    | 7.41<br>(4.35–11.68)  | 1.15 (1.08 to 1.21)     | <0.001  |

|                           |                           |                        |                           |                         |                     |        |                        |                      |                        |                       |                     |        |
|---------------------------|---------------------------|------------------------|---------------------------|-------------------------|---------------------|--------|------------------------|----------------------|------------------------|-----------------------|---------------------|--------|
| Low-middle SDI            | 299406<br>(209416–412802) | 40.1<br>(28.05–55.29)  | 458145<br>(319253–635416) | 48.99<br>(34.14–67.95)  | 0.71 (0.63 to 0.79) | <0.001 | 36968<br>(22192–58273) | 4.95<br>(2.97–7.81)  | 57896<br>(34993–89400) | 6.19<br>(3.74–9.56)   | 0.78 (0.67 to 0.9)  | <0.001 |
| Low SDI                   | 123702<br>(86213–171580)  | 27.78<br>(19.36–38.53) | 232070<br>(162104–321736) | 31.56<br>(22.05–43.76)  | 0.39 (0.34 to 0.45) | <0.001 | 15002<br>(8765–23624)  | 3.37<br>(1.97–5.3)   | 28615<br>(16728–45126) | 3.89<br>(2.27–6.14)   | 0.45 (0.38 to 0.52) | <0.001 |
| Middle SDI                | 47724<br>(33241–66741)    | 24.62<br>(17.15–34.44) | 117297<br>(81778–163192)  | 26.2<br>(18.27–36.45)   | 0.25 (0.23 to 0.26) | <0.001 | 5711<br>(3346–9041)    | 2.95<br>(1.73–4.66)  | 14035<br>(8215–22216)  | 3.13<br>(1.83–4.96)   | 0.27 (0.25 to 0.29) | <0.001 |
| <b>Region</b>             |                           |                        |                           |                         |                     |        |                        |                      |                        |                       |                     |        |
| East Asia                 | 3295<br>(2258–4674)       | 21.32<br>(14.61–30.25) | 7571<br>(5265–10554)      | 29.48<br>(20.5–41.1)    | 1.13 (1.11 to 1.15) | <0.001 | 420<br>(227–680)       | 2.72<br>(1.47–4.4)   | 989<br>(544–1599)      | 3.85<br>(2.12–6.23)   | 1.2 (1.18 to 1.22)  | <0.001 |
| Oceania                   | 4289<br>(3038–6039)       | 52.6<br>(37.25–74.06)  | 7080<br>(4959–9939)       | 72.86<br>(51.03–102.28) | 1.01 (0.94 to 1.07) | <0.001 | 563<br>(333–921)       | 6.91<br>(4.08–11.29) | 976<br>(574–1526)      | 10.04<br>(5.91–15.7)  | 1.21 (1.12 to 1.3)  | <0.001 |
| Central Asia              | 3103<br>(2114–4342)       | 20.91<br>(14.25–29.27) | 4872<br>(3327–6787)       | 26.87<br>(18.35–37.44)  | 0.74 (0.63 to 0.85) | <0.001 | 403<br>(230–650)       | 2.72<br>(1.55–4.38)  | 640<br>(360–996)       | 3.53<br>(1.99–5.5)    | 0.75 (0.61 to 0.89) | <0.001 |
| Central Europe            | 7743<br>(5320–10887)      | 27.19<br>(18.68–38.24) | 12819<br>(8887–17852)     | 33.84<br>(23.46–47.12)  | 0.47 (0.3 to 0.65)  | <0.001 | 957<br>(536–1536)      | 3.36<br>(1.88–5.39)  | 1597<br>(912–2568)     | 4.22<br>(2.41–6.78)   | 0.45 (0.26 to 0.64) | <0.001 |
| Eastern Europe            | 10693<br>(7323–15092)     | 23.24<br>(15.91–32.79) | 10248<br>(6962–14419)     | 28.78<br>(19.55–40.49)  | 0.94 (0.76 to 1.12) | <0.001 | 1359<br>(777–2167)     | 2.95<br>(1.69–4.71)  | 1310<br>(755–2099)     | 3.68<br>(2.12–5.89)   | 0.98 (0.77 to 1.18) | <0.001 |
| High-income Asia Pacific  | 12196<br>(8275–17163)     | 17.88<br>(12.13–25.16) | 23124<br>(15897–32196)    | 22.9<br>(15.74–31.88)   | 0.79 (0.75 to 0.83) | <0.001 | 1603<br>(912–2627)     | 2.35<br>(1.34–3.85)  | 3100<br>(1753–5006)    | 3.07<br>(1.74–4.96)   | 0.8 (0.73 to 0.87)  | <0.001 |
| Australasia               | 5440<br>(3767–7558)       | 26.2<br>(18.15–36.4)   | 14381<br>(9992–20055)     | 27.76<br>(19.29–38.72)  | 0.1 (0.06 to 0.14)  | <0.001 | 645<br>(359–1037)      | 3.11<br>(1.73–5)     | 1718<br>(963–2765)     | 3.32<br>(1.86–5.34)   | 0.12 (0.08 to 0.17) | <0.001 |
| Western Europe            | 314450<br>(222921–433376) | 55.46<br>(39.32–76.44) | 412946<br>(290224–575475) | 80.07<br>(56.28–111.59) | 1.36 (1.24 to 1.48) | <0.001 | 39352<br>(23515–62020) | 6.94<br>(4.15–10.94) | 53247<br>(31359–83469) | 10.33<br>(6.08–16.19) | 1.45 (1.28 to 1.62) | <0.001 |
| Southern Latin America    | 27384<br>(18979–38220)    | 31.92<br>(22.12–44.55) | 27015<br>(18607–38185)    | 39.36<br>(27.11–55.64)  | 0.59 (0.3 to 0.89)  | <0.001 | 3386<br>(1963–5310)    | 3.95<br>(2.29–6.19)  | 3381<br>(1977–5381)    | 4.93<br>(2.88–7.84)   | 0.58 (0.25 to 0.92) | 0.001  |
| High-income North America | 17518<br>(12175–24375)    | 24.85<br>(17.27–34.57) | 45480<br>(31443–63051)    | 27.27<br>(18.86–37.81)  | 0.41 (0.35 to 0.46) | <0.001 | 2077<br>(1204–3283)    | 2.95<br>(1.71–4.66)  | 5425<br>(3168–8587)    | 3.25<br>(1.9–5.15)    | 0.45 (0.38 to 0.52) | <0.001 |
| Caribbean                 | 31379<br>(22144–44102)    | 46.46<br>(32.78–65.29) | 30216<br>(21139–42581)    | 57.51<br>(40.23–81.04)  | 0.86 (0.74 to 0.98) | <0.001 | 4036<br>(2383–6307)    | 5.98<br>(3.53–9.34)  | 3976<br>(2370–6102)    | 7.57<br>(4.51–11.61)  | 0.99 (0.86 to 1.13) | <0.001 |

|                                  |                           |                        |                           |                          |                      |        |                        |                       |                        |                        |                     |        |
|----------------------------------|---------------------------|------------------------|---------------------------|--------------------------|----------------------|--------|------------------------|-----------------------|------------------------|------------------------|---------------------|--------|
| Andean Latin America             | 87514<br>(61078–123067)   | 77.4<br>(54.02–108.84) | 149113<br>(111206–194327) | 122.72<br>(91.52–159.93) | 1.64 (1.58 to 1.7)   | <0.001 | 12504<br>(7517–19832)  | 11.06<br>(6.65–17.54) | 22057<br>(14186–31673) | 18.15<br>(11.67–26.07) | 1.74 (1.66 to 1.82) | <0.001 |
| Central Latin America            | 39098<br>(27109–54377)    | 28.79<br>(19.97–40.05) | 98905<br>(68300–138152)   | 38.24<br>(26.41–53.42)   | 0.99 (0.89 to 1.09)  | <0.001 | 4749<br>(2748–7501)    | 3.5<br>(2.02–5.52)    | 12399<br>(7384–19493)  | 4.79<br>(2.86–7.54)    | 1.08 (0.97 to 1.19) | <0.001 |
| Tropical Latin America           | 1254<br>(885–1745)        | 47.64<br>(33.62–66.3)  | 2918<br>(2066–4030)       | 53.62<br>(37.96–74.06)   | 0.29 (0.22 to 0.36)  | <0.001 | 152<br>(86–241)        | 5.77<br>(3.27–9.14)   | 354<br>(202–568)       | 6.5<br>(3.72–10.43)    | 0.3 (0.24 to 0.37)  | <0.001 |
| North Africa and the Middle East | 105440<br>(73307–147751)  | 24.41<br>(16.97–34.2)  | 211607<br>(146874–295561) | 27.52<br>(19.1–38.44)    | 0.32 (0.28 to 0.36)  | <0.001 | 12703<br>(7348–19950)  | 2.94<br>(1.7–4.62)    | 25773<br>(15197–41386) | 3.35<br>(1.98–5.38)    | 0.36 (0.32 to 0.4)  | <0.001 |
| South Asia                       | 158388<br>(109746–219542) | 30<br>(20.79–41.58)    | 288868<br>(201696–402302) | 34.04<br>(23.77–47.41)   | 0.37 (0.35 to 0.39)  | <0.001 | 19204<br>(11459–30323) | 3.64<br>(2.17–5.74)   | 35575<br>(21092–55877) | 4.19<br>(2.49–6.58)    | 0.43 (0.4 to 0.45)  | <0.001 |
| Central Sub-Saharan Africa       | 9020<br>(6334–12719)      | 47.26<br>(33.19–66.64) | 15678<br>(11141–22055)    | 61.65<br>(43.8–86.72)    | 0.82 (0.77 to 0.87)  | <0.001 | 1190<br>(669–1889)     | 6.24<br>(3.51–9.9)    | 2091<br>(1226–3353)    | 8.22<br>(4.82–13.18)   | 0.9 (0.86 to 0.93)  | <0.001 |
| Eastern Sub-Saharan Africa       | 7054<br>(4929–9780)       | 32.17<br>(22.48–44.6)  | 13917<br>(9763–19415)     | 41.32<br>(28.99–57.64)   | 0.79 (0.66 to 0.91)  | <0.001 | 840<br>(498–1349)      | 3.83<br>(2.27–6.15)   | 1689<br>(1001–2671)    | 5.01<br>(2.97–7.93)    | 0.83 (0.68 to 0.98) | <0.001 |
| Southern Sub-Saharan Africa      | 13338<br>(9045–18590)     | 20.74<br>(14.06–28.9)  | 25614<br>(17734–35783)    | 28.75<br>(19.9–40.16)    | 1.17 (1.14 to 1.21)  | <0.001 | 1705<br>(975–2720)     | 2.65<br>(1.52–4.23)   | 3334<br>(1882–5326)    | 3.74<br>(2.11–5.98)    | 1.19 (1.15 to 1.22) | <0.001 |
| Western Sub-Saharan Africa       | 45565<br>(31815–65103)    | 31.63<br>(22.08–45.19) | 48865<br>(33666–70080)    | 37.29<br>(25.69–53.48)   | 0.41 (0.27 to 0.54)  | <0.001 | 5969<br>(3485–9550)    | 4.14<br>(2.42–6.63)   | 6564<br>(3865–10371)   | 5.01<br>(2.95–7.91)    | 0.51 (0.36 to 0.66) | <0.001 |
| South-East Asia Region           | 19319<br>(13501–26872)    | 27.17<br>(18.99–37.79) | 49244<br>(34119–68549)    | 27.49<br>(19.05–38.26)   | 0.03 (–0.04 to 0.09) | 0.39   | 2317<br>(1361–3630)    | 3.26<br>(1.91–5.11)   | 5923<br>(3482–9338)    | 3.31<br>(1.94–5.21)    | 0.04 (–0.02 to 0.1) | 0.18   |

Note: YLDs, years living with disability; UI, uncertainty intervals; NA, not available; AAPC, average annual percentage change; SDI, sociodemographic index.

## Supplement Data 2. Overview, data source, and modeling for Global Burden of Disease 2019

### Overview

The Global Burden of Disease (GBD) is an approach to global descriptive epidemiology.<sup>1</sup> It is a systematic, scientific effort to quantify the comparative magnitude of health loss due to diseases, injuries, and risk factors by age, sex, and geography for specific points in time. Institute for Health Metrics and Evaluation (IHME) serves as the coordinating center for the GBD and affiliated projects. Published in *The Lancet* in October 2020, GBD 2019 provides, for the first time, an independent estimation of population for each of 204 countries and territories and for the globe using a standardized, replicable approach, as well as a comprehensive update on fertility and migration.<sup>1</sup> GBD 2019 incorporates major data additions and improvements and methodological refinements. Mortality and life expectancy estimates have expanded to a total of 990 locations at the most detailed level, and new causes have been added to the fatal and nonfatal cause lists, for a total of 369 diseases and injuries (<http://www.healthdata.org/gbd/about/protocol>). GBD 2019 estimated each epidemiological quantity of interest—incidence, prevalence, mortality, years lived with disability (YLDs), years of life lost (YLLs), and disability-adjusted life-years (DALYs)—for 23 age groups; males, females, and both sexes combined; and 204 countries and territories that were grouped into 21 regions and seven super-regions. The GBD 2019 location hierarchy now includes all WHO member states. The GBD disease and injury analytical framework generated estimates for every year from 1990 to 2019. Diseases and injuries were organized into a levelled cause hierarchy from the three broadest causes of death and disability at Level 1 to the most specific causes at Level 4. Within the three Level 1 causes—communicable, maternal, neonatal, and nutritional diseases; noncommunicable diseases; and injuries—there are 22 Level 2 causes, 174 Level 3 causes, and 301 Level 4 causes (including 131 Level 3 causes that are not further disaggregated at Level 4). In total, 364 causes are nonfatal and 286 are fatal.<sup>1</sup>

### Data sources

The GBD estimation process is based on identifying multiple relevant data sources for each disease or injury, including censuses, household surveys, civil registration and vital statistics, disease registries, health service use, air pollution monitors, satellite imaging, disease notifications, and other sources. Each of these types of data is identified from a systematic review of published studies, searches of government and international organization websites, published reports, primary data sources such as the Demographic and Health Surveys, and contributions of datasets by GBD collaborators. A total of 86,249 sources were used in this analysis, including 19,354 sources reporting deaths, 31,499 reporting incidence, 1973 reporting prevalence, and 26,631 reporting other metrics. Each newly identified and obtained data source is given a unique identifier by a team of librarians and included in the Global Health Data Exchange (GHDx). The GHDx makes publicly available the metadata for each source included in GBD as well as the data, where allowed by the data provider. Additional metadata for each source are available in the online GBD citation tool, <http://ghdx.healthdata.org/gbd-results-tool>.

### Modeling

For most diseases and injuries, processed data are modeled using standardized tools to generate estimates of each quantity of interest by age, sex, location, and year.<sup>1</sup> There are three main standardized tools: the cause of death ensemble model (CODEm), spatiotemporal Gaussian process regression (ST-GPR), and DisMod-MR. Previous publications provide

more details on these general GBD methods.<sup>2-4</sup> Briefly, CODEm is a highly systematized tool to analyze cause of death data using an ensemble of different modeling methods for rates or cause fractions with varying choices of covariates that perform best with out-of-sample predictive validity testing. DisMod-MR is a Bayesian meta-regression tool that allows evaluation of all available data on incidence, prevalence, remission, and mortality for a disease, enforcing consistency between epidemiological parameters. Previous studies showed that DisMod-MR can produce robust and valid estimates compared with real surveillance data.<sup>5</sup> ST-GPR is a set of regression methods that borrow strength between locations and over time for single metrics of interest, such as risk factor exposure or mortality rates.<sup>1</sup>

### Supplement Data 3. Gout case definition, input data, and methodology in Global Burden of Disease 2019.

#### Definition and data process

Gout was categorized under the musculoskeletal disorders in the Global Burden of Disease 2019. Gout is a rheumatic disease that is characterised by deposition of monosodium urate (MSU) crystals in the synovial fluid of joints and in other tissues, causing inflammation. The crystal formation is caused by elevated urate levels in extracellular fluids. GBD uses the case definition of primary gout given by the American College of Rheumatology, generally referred to as ARA 1977 survey criteria requiring the presence of MSU crystals in joint fluid or the presence of a tophus proven to contain MSU crystals and at least six of 12 gout symptoms or findings (>1 attack of acute arthritis, development of maximal inflammation within a day, attack of monoarticular arthritis, observation of joint erythema, pain or swelling in the first MTP joint, unilateral attack involving the first MTP joint, unilateral attack involving tarsal joint, suspected tophus, hyperuricemia, asymmetrical swelling within a joint on X-ray and negative culture of joint fluid for microorganisms during attack of joint inflammation) to make a diagnosis.

The ICD-10 code for gout is M10 and the ICD9 code is 274.

#### Flowchart

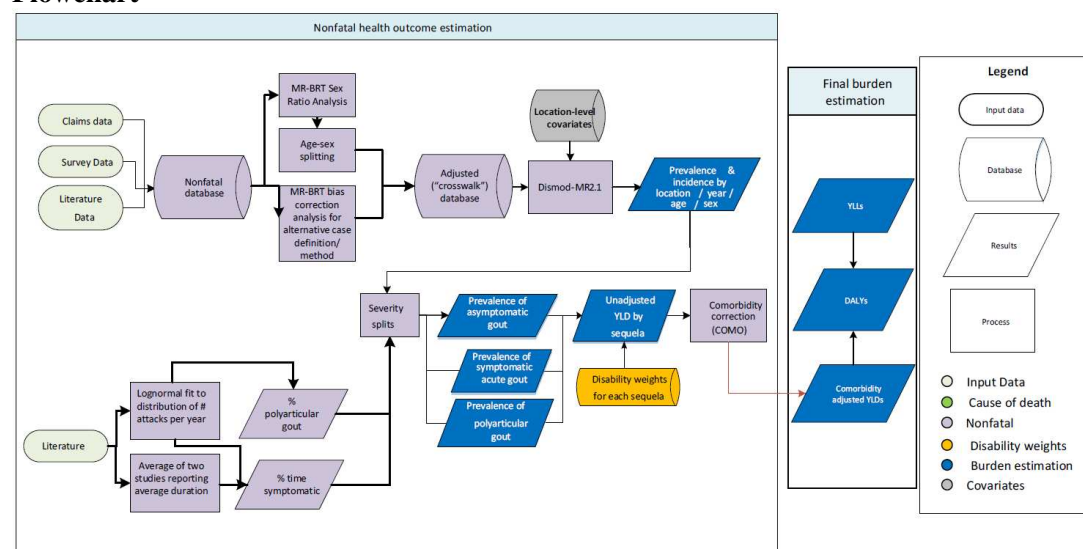

#### Input Data and Methodological Summary for Gout

##### Input data

The last systematic review was conducted in GBD 2013 for studies published between 1980 to 2009 using the following search terms on MEDLINE, EMBASE, CINAHL, CAB Abstracts, WHO Library (WHOLIS), and OpenSIGLE. For prevalence and incidence, the following search terms were used: (gout\* OR hyperuricemia) AND (prevalen\* OR inciden\* OR cross-sectional OR cross sectional OR epidemiol\* OR survey OR population-based OR population based OR population study OR population sample OR cohort OR follow-up OR follow up OR longitudinal OR regist\*) AND (list of names of all GBD countries).

Exclusion criteria were:

- Sub-populations clearly not representative of the national population
- Not a population-based study
- Low sample size (less than 150)
- Review rather than original studies

For GBD 2019, 14 additional studies shared through the collaborator network were added. In addition, data from USA claims data for 2000 and 2010–2014 by state and Taiwan claims data from 2016 were included.

### Data inputs for gout

| Measure                      | Total sources | Countries with data |
|------------------------------|---------------|---------------------|
| All measures                 | 130           | 36                  |
| Prevalence                   | 113           | 34                  |
| Incidence                    | 15            | 6                   |
| Relative risk                | 3             | 2                   |
| Standardized mortality ratio | 1             | 1                   |
| Proportion                   | 7             | 3                   |

### Age and sex splitting

Reported estimates of prevalence were split by age and sex where possible. First, if studies reported prevalence for broad age groups by sex (eg, prevalence in 15- to 65-year-old males and females separately), and also by specific age groups for both sexes combined (eg, prevalence in 15- to 30-year-olds, then in 31- to 65-year-olds, for males and females combined), age-specific estimates were split by sex using the reported sex ratio and bounds of uncertainty. Second, prevalence data for both sexes that could not be split using a within-study ratio were split using a sex ratio derived from a meta-analysis of existing sex-specific data using MR-BRT. The female to male ratio was 0.33 (0.33 to 0.34). Finally, after the application of bias adjustments, where studies reported estimates across age groups 25 years or more, these were split into five-year age groups using the prevalence age pattern estimated by DisMod-MR 2.1 in GBD 2017.

### Data adjustment

We used study covariates for studies relying on self-reported diagnoses and those identifying sources through a diagnostic code in administrative data, which include gout ICD codes as well as read codes used in the UK health system. We used MR-BRT to adjust alternative case definition and claims data in the USA from the year 2000 and from 2010 onward and for Taiwan claims data to the reference case definition. Matched data was based off of age, sex, year, and location. The mean and standard error for the coefficients were calculated using the MR-BRT crosswalk adjustment method. Betas and exponentiated values (which can be interpreted as an odds ratio) for these covariates are shown in the table below:

#### MR-BRT crosswalk adjustment factors for gout

| Data input                               | Reference or alternative case definition | Gamma | Beta Coefficient, Log (95% CI) | Adjustment factor*  |
|------------------------------------------|------------------------------------------|-------|--------------------------------|---------------------|
| Physician-diagnosed gout                 | Ref                                      | 0.55  | --                             | --                  |
| Self-reported gout                       | Alt                                      |       | 0.33 (0.050 to 0.60)           | 1.30 (1.05 to 1.83) |
| Gout identified with administrative data | Alt                                      |       | 0.29 (0.29 to 0.30)            | 1.34 (1.34 to 1.35) |



|                    |        |     |  |                        |                      |
|--------------------|--------|-----|--|------------------------|----------------------|
| USA data-2000      | claims | Alt |  | -1.88 (-2.84 to -0.92) | 0.15 (0.058 to 0.40) |
| USA data-2010-2016 | claims | Alt |  | -1.55 (-2.00 to -1.09) | 0.22 (0.13 to 0.34)  |
| Taiwan data-2016   | claims | Alt |  | 0.30 (0.27 to 0.33)    | 1.35 (1.31 to 1.40)  |

\*Adjustment factor is the transformed Beta coefficient in normal space, and can be interpreted as the factor by which the alternative case definition is adjusted to reflect what it would have been if measured as the reference.

### Modeling strategy

Prior settings included assuming the excess mortality rate and remission of gout did not exceed 0.01 and 0.2, respectively, and that there was no incidence or prevalence of gout before the age of 15 years. We have made no substantive changes in the modeling strategy from GBD 2017, with the exception of increasing the coefficient of variation from 0.4 at the Global, Super Region, and Region levels to 0.8 to allow the model to better follow the data. We included the summary exposure variable (SEV) scalar for gout which summarises exposure to risks estimated in GBD to impinge on gout, ie, low glomerular filtration rate, as a country covariate. We set bounds of 0.75 to 1.25 as the SEV is constructed in a way that if our risk estimates are accurate the value should be 1.

### Severity and Disability

The basis of the GBD disability weight (DW) survey assessments are lay descriptions of sequelae highlighting major functional consequences and symptoms. The lay descriptions and disability weights for gout severity levels are shown below.

Severity distribution, details on the severity levels for gout in GBD 2019 and the associated disability weight (DW) with that severity.

| Severity level                             | Lay description                                                                                                                                                                                                                                    | DW (95% CI)         |
|--------------------------------------------|----------------------------------------------------------------------------------------------------------------------------------------------------------------------------------------------------------------------------------------------------|---------------------|
| Gout, acute                                | This person has severe pain and swelling in the leg, making it very difficult to get up and down, stand, walk, lift, and carry heavy things. The person has trouble sleeping because of the pain.                                                  | 0.295 (0.196-0.409) |
| Polyarticular gout (same as for severe RA) | This person has severe, constant pain and deformity in most joints, causing difficulty moving around, getting up and down, eating, dressing, lifting, carrying, and using the hands. The person often feels sadness, anxiety, and extreme fatigue. | 0.581 (0.403-0.739) |
| Asymptomatic gout                          | This person has a diagnosis of gout without pain or functional difficulties                                                                                                                                                                        | 0                   |

To calculate the severity distribution of gout, we used three studies on the distribution of the

number of gout attacks per year and fitted a lognormal curve using a least squared differences method. In the absence of data on the proportion of gout cases who have chronic polyarticular gout, we assumed the proportion is equal to those who would have 52 attacks a year (ie, weekly) or more as implied by the lognormal curve.

The average number of attacks was estimated from the lognormal fit: 5.66 (5.14–6.18). From two studies we derived an average duration of attacks of 6.1 (5.4–6.8) days by simple averaging. The resulting proportion of time symptomatic for acute gout was taken as the multiplication of these two estimates divided by the number of days in a year: 9.4% (8.0–10.9%).

### References

1. Edwards NL, Sundry JS, Forsythe A, Blume S, Pan F, Becker MA. Work productivity loss due to flares in patients with chronic gout refractory to conventional therapy. *Journal of Medical Economics*. 2011; 14(1).
2. Yu, KH, Luo SF, et al. Younger age of onset of gout in Taiwan. *Rheumatology*. 2003; 42(1): p. 166-170.
3. Yu TF, et al. Diversity of clinical features in gouty arthritis. *Seminars in Arthritis and Rheumatism*. 1984; 13(4): p. 360-368.

**Supplement Data 4.** The prevalence, incidence, and years lived with disability rates of gout in adolescents and young adults aged 15-39 years from 1990 to 2019 at the global level.

| Year | gout, rate (95% UI) per 100000 population |                  |           |               |      |              |
|------|-------------------------------------------|------------------|-----------|---------------|------|--------------|
|      | Prevalence                                | 95% CI           | Incidence | 95% CI        | YLD  | 95% CI       |
| 1990 | 145.19                                    | 100.2 to 202.76  | 38.71     | 1990 to 38.71 | 4.89 | 2.91 to 7.75 |
| 1991 | 146.01                                    | 100.76 to 203.47 | 38.88     | 1991 to 38.88 | 4.92 | 2.93 to 7.68 |
| 1992 | 146.93                                    | 101.4 to 204.43  | 39.07     | 1992 to 39.07 | 4.94 | 2.96 to 7.75 |
| 1993 | 147.82                                    | 102.01 to 205.47 | 39.26     | 1993 to 39.26 | 4.98 | 2.99 to 7.75 |
| 1994 | 148.65                                    | 102.57 to 206.64 | 39.44     | 1994 to 39.44 | 5.01 | 3.02 to 7.78 |
| 1995 | 149.53                                    | 103.13 to 208.07 | 39.63     | 1995 to 39.63 | 5.04 | 3.03 to 7.86 |
| 1996 | 150.73                                    | 104.03 to 209.54 | 39.89     | 1996 to 39.89 | 5.08 | 3.05 to 7.9  |
| 1997 | 152.44                                    | 105.31 to 212.18 | 40.26     | 1997 to 40.26 | 5.13 | 3.09 to 7.98 |
| 1998 | 154.64                                    | 106.97 to 215.32 | 40.73     | 1998 to 40.73 | 5.21 | 3.13 to 8.13 |
| 1999 | 157.02                                    | 108.8 to 218.14  | 41.22     | 1999 to 41.22 | 5.28 | 3.16 to 8.18 |
| 2000 | 159.13                                    | 110.44 to 220.79 | 41.65     | 2000 to 41.65 | 5.36 | 3.22 to 8.31 |
| 2001 | 161.04                                    | 111.48 to 223.52 | 42.03     | 2001 to 42.03 | 5.42 | 3.28 to 8.37 |
| 2002 | 162.89                                    | 112.7 to 226.18  | 42.43     | 2002 to 42.43 | 5.48 | 3.33 to 8.54 |
| 2003 | 164.29                                    | 114.27 to 228.01 | 42.74     | 2003 to 42.74 | 5.53 | 3.33 to 8.52 |
| 2004 | 165.18                                    | 115.26 to 229.13 | 42.94     | 2004 to 42.94 | 5.56 | 3.34 to 8.61 |
| 2005 | 165.53                                    | 115.74 to 229.38 | 43.01     | 2005 to 43.01 | 5.57 | 3.36 to 8.67 |
| 2006 | 165.84                                    | 116.37 to 229.09 | 43.08     | 2006 to 43.08 | 5.59 | 3.39 to 8.57 |
| 2007 | 166.29                                    | 117.16 to 229.01 | 43.18     | 2007 to 43.18 | 5.60 | 3.4 to 8.59  |
| 2008 | 166.75                                    | 117.94 to 229.56 | 43.30     | 2008 to 43.3  | 5.61 | 3.39 to 8.63 |
| 2009 | 167.05                                    | 118.54 to 229.83 | 43.42     | 2009 to 43.42 | 5.62 | 3.41 to 8.65 |
| 2010 | 167.12                                    | 118.83 to 229.4  | 43.53     | 2010 to 43.53 | 5.63 | 3.41 to 8.61 |
| 2011 | 167.08                                    | 118.75 to 229.31 | 43.66     | 2011 to 43.66 | 5.63 | 3.42 to 8.65 |
| 2012 | 167.32                                    | 118.87 to 229.65 | 43.85     | 2012 to 43.85 | 5.64 | 3.42 to 8.6  |
| 2013 | 167.93                                    | 119.28 to 230.56 | 44.12     | 2013 to 44.12 | 5.66 | 3.44 to 8.69 |
| 2014 | 168.95                                    | 119.96 to 232.05 | 44.45     | 2014 to 44.45 | 5.69 | 3.48 to 8.81 |
| 2015 | 170.38                                    | 121.02 to 234.02 | 44.83     | 2015 to 44.83 | 5.74 | 3.49 to 8.83 |
| 2016 | 173.49                                    | 123.57 to 238.15 | 45.56     | 2016 to 45.56 | 5.84 | 3.57 to 8.98 |
| 2017 | 176.43                                    | 125.91 to 242.96 | 46.21     | 2017 to 46.21 | 5.93 | 3.62 to 9.05 |
| 2018 | 176.93                                    | 125.55 to 243.63 | 46.27     | 2018 to 46.27 | 5.95 | 3.6 to 9.16  |
| 2019 | 175.68                                    | 123.78 to 242.53 | 45.93     | 2019 to 45.93 | 5.91 | 3.59 to 9.14 |

**Supplement Data 5.** The incidence of gout in senior population aged over 55years from 1990 to 2019 at the global level.

| Year | Incidence rate per 100<br>000 population | 95% CI lower | 95% CI upper |
|------|------------------------------------------|--------------|--------------|
| 1990 | 307.2856808                              | 410.308      | 225.8532     |
| 1991 | 305.9773958                              | 408.5006     | 225.3041     |
| 1992 | 304.765622                               | 406.7928     | 224.8023     |
| 1993 | 303.8665672                              | 405.4772     | 224.5249     |
| 1994 | 303.4752208                              | 404.8217     | 224.6847     |
| 1995 | 303.6833375                              | 404.1583     | 225.3792     |
| 1996 | 304.3042593                              | 404.3793     | 225.6123     |
| 1997 | 305.020984                               | 404.7103     | 225.9555     |
| 1998 | 305.942931                               | 405.2992     | 226.8294     |
| 1999 | 306.9976559                              | 406.0227     | 227.4356     |
| 2000 | 308.2647622                              | 407.39       | 228.0862     |
| 2001 | 310.5946462                              | 410.6131     | 229.9605     |
| 2002 | 314.2873827                              | 415.6476     | 232.8822     |
| 2003 | 318.763158                               | 422.0685     | 236.4508     |
| 2004 | 323.2269755                              | 428.3885     | 240.1688     |
| 2005 | 327.1192055                              | 433.5564     | 243.5506     |
| 2006 | 331.701776                               | 439.955      | 246.8597     |
| 2007 | 338.600849                               | 448.4973     | 251.9806     |
| 2008 | 345.9987421                              | 457.4768     | 258.3688     |
| 2009 | 352.4814948                              | 465.6196     | 264.1286     |
| 2010 | 356.2992934                              | 470.6868     | 267.9168     |
| 2011 | 358.2367032                              | 473.3613     | 269.526      |
| 2012 | 359.877649                               | 475.2542     | 270.645      |
| 2013 | 361.5877114                              | 477.4505     | 271.7524     |
| 2014 | 364.0229702                              | 480.6621     | 273.783      |
| 2015 | 367.5399924                              | 485.5992     | 276.3855     |
| 2016 | 377.0283618                              | 497.2748     | 282.6505     |
| 2017 | 384.9452385                              | 507.489      | 288.5724     |
| 2018 | 383.9028046                              | 506.2817     | 287.7675     |
| 2019 | 377.4045539                              | 498.0329     | 282.5615     |

The AAPC of the incidence rate of gout and 95% CI during 1990 and 2019 was calculated. AAPC= 0.93 (95% CI: 0.83 to 1.03)

**Supplement Data 6.** The joinpoint regression of gout incidence, prevalence, and YLD in adolescents and young adults aged 15-39 years between 1990 and 2019 globally.

| Lower Endpoint    | Upper Endpoint | APC  | Lower CI | Upper CI | Test Statistic (t) | Prob >  t |
|-------------------|----------------|------|----------|----------|--------------------|-----------|
| <b>YLDs</b>       |                |      |          |          |                    |           |
| 1990              | 1996           | 0.6* | 0.6      | 0.7      | 21.8               | < 0.001   |
| 1996              | 2003           | 1.3* | 1.2      | 1.3      | 43.7               | < 0.001   |
| 2003              | 2014           | 0.2* | 0.2      | 0.2      | 14.4               | < 0.001   |
| 2014              | 2017           | 1.5* | 1.1      | 1.9      | 8.7                | < 0.001   |
| 2017              | 2019           | -0.1 | -0.5     | 0.3      | -0.5               | 0.592     |
| <b>Incidence</b>  |                |      |          |          |                    |           |
| 1990              | 1996           | 0.5* | 0.5      | 0.6      | 27.3               | < 0.001   |
| 1996              | 2003           | 1.0* | 1        | 1.1      | 53.9               | < 0.001   |
| 2003              | 2011           | 0.2* | 0.2      | 0.3      | 15.1               | < 0.001   |
| 2011              | 2014           | 0.6* | 0.3      | 0.8      | 5                  | < 0.001   |
| 2014              | 2017           | 1.4* | 1.1      | 1.6      | 12.3               | < 0.001   |
| 2017              | 2019           | -0.2 | -0.5     | 0        | -2.1               | 0.059     |
| <b>Prevalence</b> |                |      |          |          |                    |           |
| 1990              | 1996           | 0.6* | 0.6      | 0.7      | 22                 | < 0.001   |
| 1996              | 2003           | 1.3* | 1.2      | 1.4      | 44.9               | < 0.001   |
| 2003              | 2014           | 0.2* | 0.2      | 0.2      | 13.6               | < 0.001   |
| 2014              | 2017           | 1.6* | 1.2      | 2        | 9.3                | < 0.001   |
| 2017              | 2019           | -0.1 | -0.5     | 0.2      | -0.7               | 0.493     |

**Supplement Data 7. Rates and number of cases of gout by SDI.**

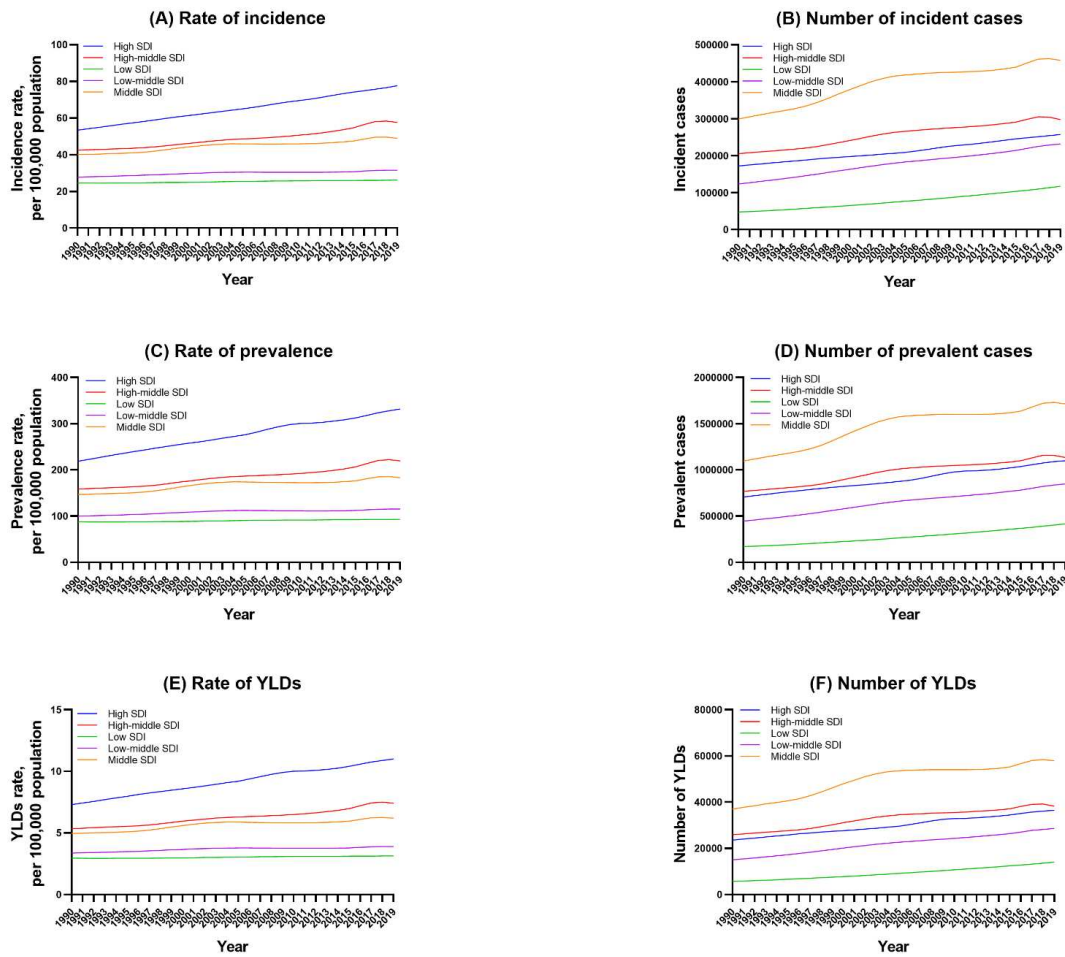

**Supplement 8. Proportional attributable fraction of high-BMI by sex, age subgroup, and regions.**

|                              | <b>Proportional attributable fractions</b> | <b>Lower 95% CI</b> | <b>Higher 95% CI</b> |
|------------------------------|--------------------------------------------|---------------------|----------------------|
| <b>Total</b>                 |                                            |                     |                      |
| <b>Age subgroups</b>         |                                            |                     |                      |
| 15-19                        | --                                         | --                  | --                   |
| 20-24                        | 20.17%                                     | 9.85%               | 34.31%               |
| 25-29                        | 26.13%                                     | 13.67%              | 42.49%               |
| 30-34                        | 29.36%                                     | 15.82%              | 46.41%               |
| 35-39                        | 32.03%                                     | 17.68%              | 50.11%               |
| <b>Sex</b>                   |                                            |                     |                      |
| Male                         | 30.69%                                     | 15.56%              | 49.10%               |
| Female                       | 24.88%                                     | 13.55%              | 38.49%               |
| <b>Regions</b>               |                                            |                     |                      |
| Andean Latin America         | 38.72%                                     | 22.19%              | 57.70%               |
| Australasia                  | 46.08%                                     | 27.32%              | 67.31%               |
| Caribbean                    | 34.39%                                     | 20.53%              | 51.10%               |
| Central Asia                 | 36.73%                                     | 20.95%              | 55.62%               |
| Central Europe               | 39.95%                                     | 23.66%              | 58.92%               |
| Central Latin America        | 38.02%                                     | 22.95%              | 55.49%               |
| Central Sub-Saharan Africa   | 15.41%                                     | 6.49%               | 28.34%               |
| East Asia                    | 22.67%                                     | 9.62%               | 40.27%               |
| Eastern Europe               | 37.54%                                     | 21.99%              | 56.09%               |
| Eastern Mediterranean Region | 37.62%                                     | 22.55%              | 55.10%               |
| Eastern Sub-Saharan Africa   | 20.13%                                     | 9.87%               | 34.52%               |
| High-income Asia Pacific     | 19.68%                                     | 7.63%               | 37.52%               |
| High-income North America    | 49.92%                                     | 28.93%              | 70.93%               |
| North Africa and Middle East | 43.31%                                     | 26.60%              | 61.69%               |
| Oceania                      | 26.13%                                     | 12.79%              | 43.57%               |
| South Asia                   | 20.99%                                     | 10.47%              | 35.81%               |
| Southeast Asia               | 24.14%                                     | 12.79%              | 39.43%               |
| Southern Latin America       | 36.36%                                     | 18.69%              | 57.38%               |
| Southern Sub-Saharan Africa  | 35.05%                                     | 20.38%              | 52.30%               |
| Tropical Latin America       | 40.97%                                     | 25.44%              | 58.28%               |
| Western Europe               | 35.07%                                     | 18.63%              | 54.75%               |
| Western Pacific Region       | 22.94%                                     | 10.13%              | 40.42%               |
| Western Sub-Saharan Africa   | 26.47%                                     | 14.04%              | 42.13%               |

**Supplement 9. Proportional attributable fraction of kidney dysfunction by sex, age subgroup, and regions.**

|                              | <b>Proportional attributable fractions</b> | <b>Lower CI</b> | <b>95% CI</b> | <b>Higher CI</b> | <b>95% CI</b> |
|------------------------------|--------------------------------------------|-----------------|---------------|------------------|---------------|
| <b>Total</b>                 |                                            |                 |               |                  |               |
| <b>Age subgroups</b>         |                                            |                 |               |                  |               |
| 15-19                        | --                                         | --              | --            | --               | --            |
| 20-24                        | --                                         | --              | --            | --               | --            |
| 25-29                        | 1.23%                                      | 1.00%           | 1.48%         |                  |               |
| 30-34                        | 1.38%                                      | 1.13%           | 1.67%         |                  |               |
| 35-39                        | 1.71%                                      | 1.38%           | 2.09%         |                  |               |
| <b>Sex</b>                   |                                            |                 |               |                  |               |
| Male                         | 1.41%                                      | 1.18%           | 1.66%         |                  |               |
| Female                       | 1.61%                                      | 1.34%           | 1.92%         |                  |               |
| <b>Regions</b>               |                                            |                 |               |                  |               |
| Andean Latin America         | 1.69%                                      | 1.41%           | 2.02%         |                  |               |
| Australasia                  | 0.80%                                      | 0.64%           | 1.00%         |                  |               |
| Caribbean                    | 2.03%                                      | 1.68%           | 2.43%         |                  |               |
| Central Asia                 | 2.97%                                      | 2.48%           | 3.53%         |                  |               |
| Central Europe               | 1.40%                                      | 1.11%           | 1.71%         |                  |               |
| Central Latin America        | 2.88%                                      | 2.41%           | 3.44%         |                  |               |
| Central Sub-Saharan Africa   | 1.01%                                      | 0.83%           | 1.21%         |                  |               |
| East Asia                    | 1.07%                                      | 0.88%           | 1.27%         |                  |               |
| Eastern Europe               | 2.72%                                      | 2.23%           | 3.31%         |                  |               |
| Eastern Sub-Saharan Africa   | 0.95%                                      | 0.79%           | 1.12%         |                  |               |
| High-income Asia Pacific     | 1.05%                                      | 0.84%           | 1.30%         |                  |               |
| High-income North America    | 1.36%                                      | 1.12%           | 1.62%         |                  |               |
| North Africa and Middle East | 2.14%                                      | 1.79%           | 2.52%         |                  |               |
| Oceania                      | 1.81%                                      | 1.52%           | 2.14%         |                  |               |
| South Asia                   | 1.51%                                      | 1.27%           | 1.80%         |                  |               |
| Southeast Asia               | 1.91%                                      | 1.62%           | 2.25%         |                  |               |
| South-East Asia Region       | 1.64%                                      | 1.38%           | 1.94%         |                  |               |
| Southern Latin America       | 1.02%                                      | 0.83%           | 1.24%         |                  |               |
| Southern Sub-Saharan Africa  | 1.84%                                      | 1.52%           | 2.21%         |                  |               |
| Tropical Latin America       | 1.72%                                      | 1.40%           | 2.06%         |                  |               |
| Western Europe               | 0.69%                                      | 0.55%           | 0.85%         |                  |               |
| Western Sub-Saharan Africa   | 1.68%                                      | 1.41%           | 1.98%         |                  |               |
